# Supplementary material for: Multifunctional magnetic nanoparticle cloud assemblies for in situ capture of bacteria and isolation of microbial DNA
Source: Royal Society of Chemistry journal article supplement (doi:10.1039/d1an01297e), 2021-01-01
Supplement: d1an01297e1.pdf [file d1an01297e1.pdf]

Electronic supplementary information (ESI) for

# **Multifunctional magnetic nanoparticle cloud assemblies for *in-situ* capture of bacteria and isolation of microbial DNA**

Lucas Poncelet, Lidija Malic, Liviu Clime, Matthias Geissler, Keith J. Morton, Christina Nassif, Dillon Da Fonte, Gaétan Veilleux and Teodor Veres

*Life Sciences Division, National Research Council of Canada, 75 de Mortagne Boulevard, Boucherville, QC, J4B 6Y4, Canada. E-mail: lidija.malic@cnrc-nrc.gc.ca*

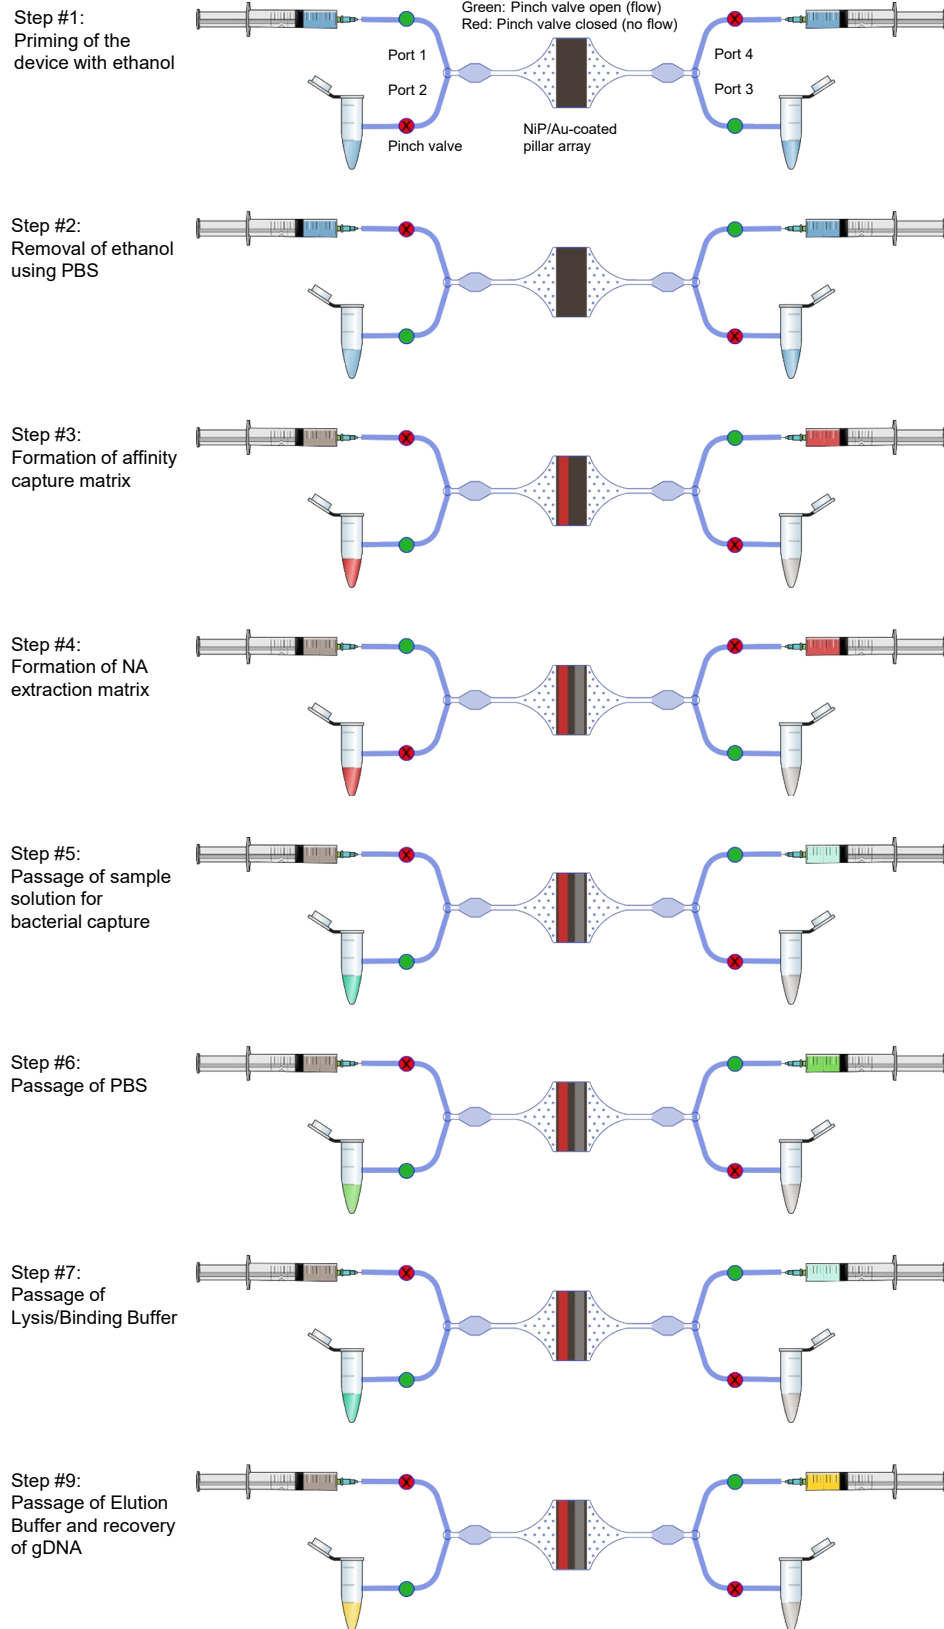

**Fig. S1** Schematics depicting the pathway of fluid at different stages of the process.
